# Supplementary material for: Fatty Acid Induced Hypermethylation in the Slc2a4 Gene in Visceral Adipose Tissue Is Associated to Insulin-Resistance and Obesity
Source: MDPI journal article supplement (doi:10.3390/ijms24076417), 2023-03-29
Supplement: s1 [file s1]

## Supplementary Materials:

### Supplementary figures

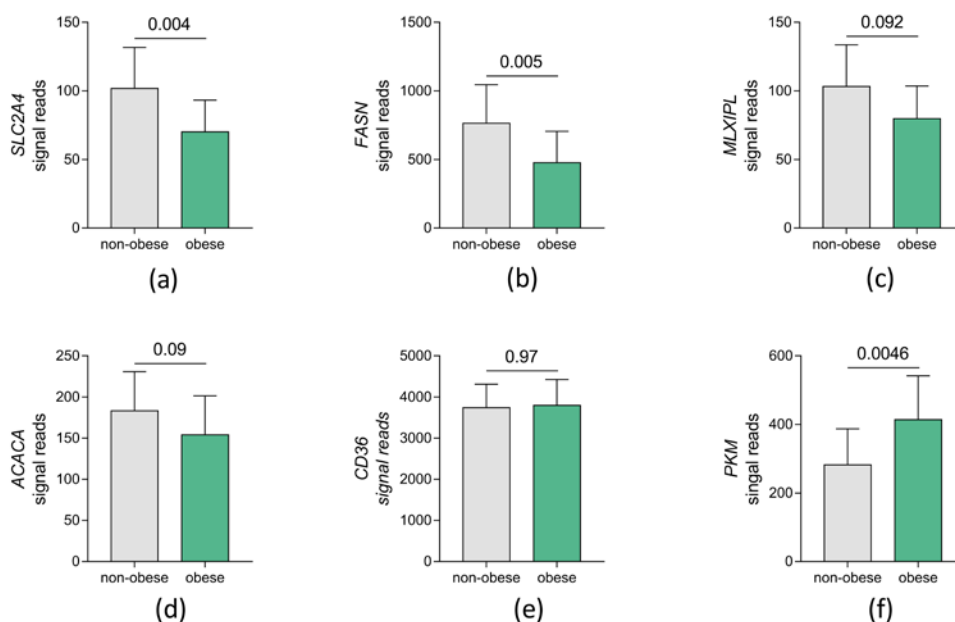

**Figure S1.** Gene expression from publicly available transcriptomic data (GSE25401) with (a) *SLC2A4*; (b) *FASN*; (c) *MLXIPL*; (d) *ACACA*; (e) *CD36* and (f) *PKM* gene expression, which are highlighted in the volcano plot in figure 1c.

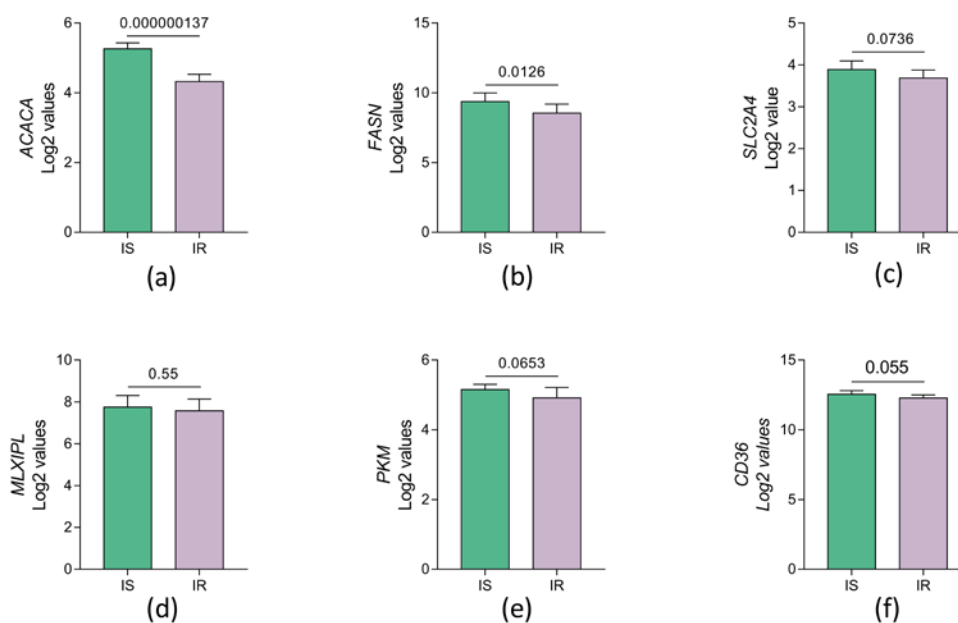

**Figure S2.** Gene expression from publicly available transcriptomic data (GSE20950) with (a) *ACACA*; (b) *FASN*; (c) *SLC2A4*; (d) *MLXIPL*; (e) *PKM* and (f) *CD36*, which are highlighted in the volcano plot in figure 1d.

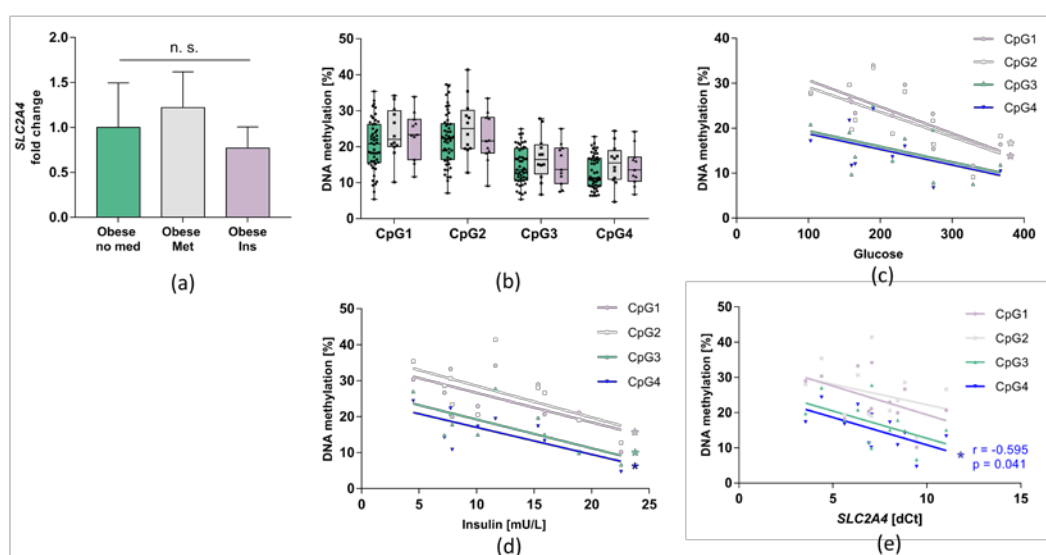

**Figure S3. SLC2A4 gene expression and DNA methylation in VAT of human subcohorts.** a) SLC2A4 gene expression in VAT of obese subjects with no medication (Obese no med,  $n = 56$ ), obese with metformin and other oral anti-diabetics (no information on further medication, Obese Met,  $n = 15$ ) and obese subjects with insulin treatment (Obese Ins,  $n = 11$ ). b) DNA methylation in VAT of subcohorts. c) Pearson correlation of basal glucose levels with DNA methylation in Obese Ins subjects ( $n = 11$ ). d) Pearson correlation of insulin levels with DNA methylation in Obese Met subjects ( $n = 10$ ). e) Pearson correlation of SLC2A4 gene expression with DNA methylation in Obese Met subjects ( $n = 12$ ). n.s. = non significant.

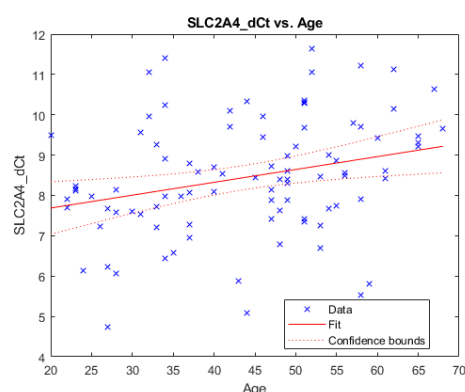

**Figure S4. Stepwise regression model excluding SLC2A4 DNA methylation.**

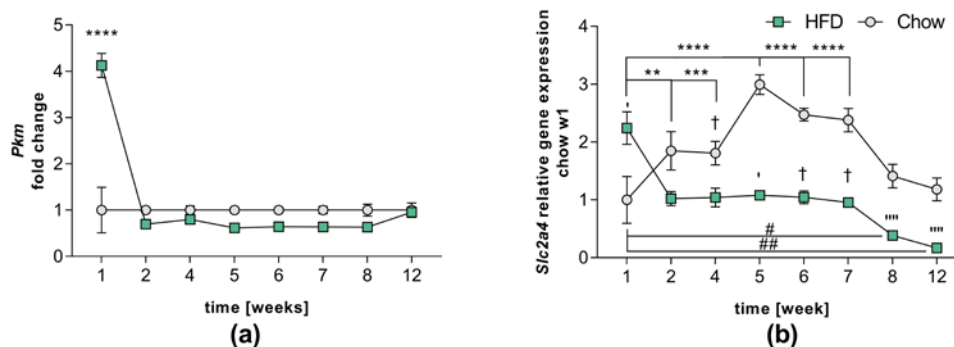

**Figure S5. (a) Pkm gene expression in VAT of DIO mice.** Mean  $\pm$  SEM of HFD ( $n = 7-16$ ) and chow ( $n = 8-16$ ) is shown. A Two-Way ANOVA using the Sidak correction for multiple testing was performed with \*\*\*\* =  $p < 0.0001$ . (b) Slc2a4 gene expression normalized to week 1 chow. Mean  $\pm$  SEM is shown with Chow ( $n = 8-16$ ) and HFD ( $n = 7-16$ ). A Two-Way ANOVA was performed using

Sidak correction for multiple testing (120 in total).  $*/\# = p < 0.05$ ,  $*/\#/\# = p < 0.01$ ,  $*/\#/\#/\# = p < 0.001$ ,  $*/\#/\#/\#/\# = p < 0.0001$ . \* indicates significances between different chow weeks to chow week 1, # indicates significances between different HFD weeks to chow week 1, ' indicates significances within a week comparing Chow versus HFD and † indicates  $p < 0.05$  before adjusting for multiple testing.

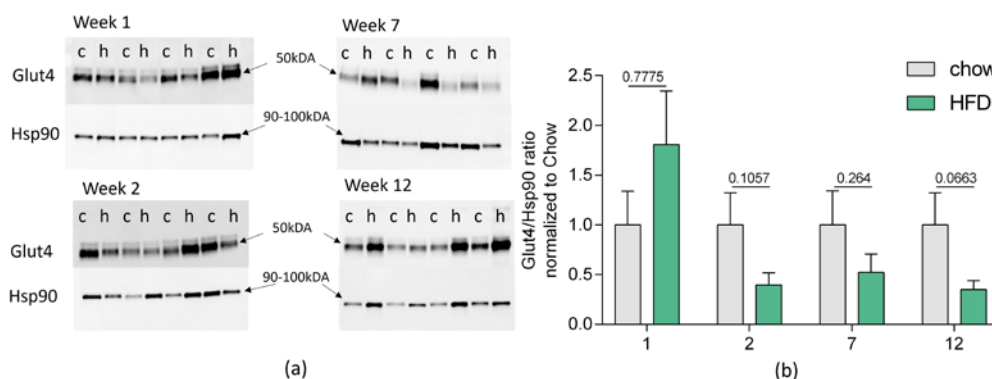

**Figure S6. Western blot of VAT from DIO mice** a) Representative HRP-signal from four animals per group with h = HFD and c = chow are shown b) Western blot of Glut4 protein in VAT of DIO mice. Mean  $\pm$  SEM of week 1, 2, 7 and 12 are shown from chow ( $n = 8$ ) and HFD mice ( $n = 7 - 8$ ). A multiple t-test was performed.

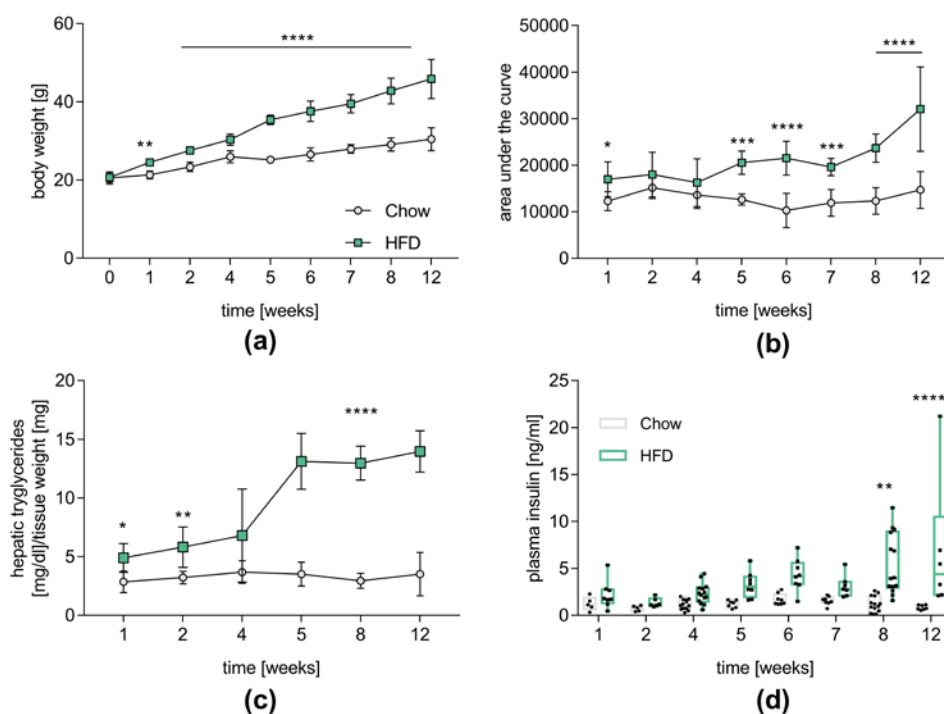

**Figure S7. Data of the DIO mouse model (modified [30]).** (a) Body weight presented with mean  $\pm$  SD (chow = 8 – 16, HFD = 7 – 16); (b) Area under the curve of i.p. glucose tolerance tests with mean  $\pm$  SD (chow = 8 – 16, HFD = 7 – 16); (c) Hepatic triglyceride levels with mean  $\pm$  SD (chow = 8 – 16, HFD = 7 – 16); (d) Plasma insulin levels with median  $\pm$  min/max (chow = 5 – 13, HFD = 6 – 15). \* =  $p < 0.05$ , \*\* =  $p < 0.01$ , \*\*\* =  $p < 0.001$ , \*\*\*\* =  $p < 0.0001$

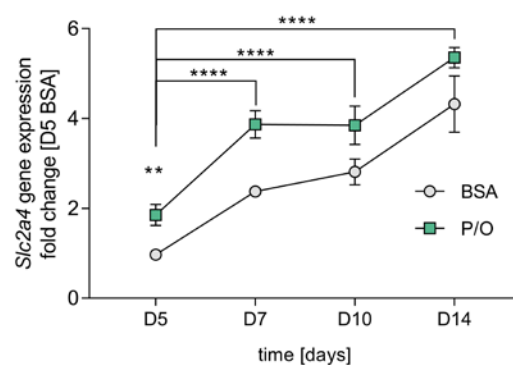

**Figure S8.** *Slc2a4* gene expression in 3T3 cells normalized to BSA control at D5. \*\* =  $p < 0.01$ , \*\*\*\* =  $p < 0.0001$

### Supplementary tables

**Table S1.** Estimate values calculated for the stepwise regression model including SLC2A4 DNA methylation seen in figure 1k and formular 2. Number of observations = 94.

| Estimates | Estimates value | P value    |
|-----------|-----------------|------------|
| $\beta$   |                 |            |
| $\beta_0$ | 13.281          | 0.018501   |
| $\beta_1$ | 0.0028359       | 0.045025   |
| $\beta_2$ | -0.014897       | 0.0050012  |
| $\beta_3$ | 0.0086405       | 0.085903   |
| $\beta_4$ | 0.0117          | 0.043468   |
| $\beta_5$ | -0.074511       | 0.015191   |
| $\beta_6$ | 0.0059353       | 0.0043084  |
| $\beta_7$ | -0.013651       | 0.029534   |
| $\beta_8$ | 0.035458        | 0.00058659 |
| $\beta_9$ | -0.032362       | 0.0032492  |

**Table S2.** Primer sequences used for bisPCR and pyrosequencing.

| Name                    | Sequence               | Species |
|-------------------------|------------------------|---------|
| f_Slc2a4_ROI_bisDNA     | GGAGGGATGGTAGTGAGTGG   | mouse   |
| r_Slc2a4_ROI_bisDNA_bio | CCCCCCTCACTCAAATTTCTCT | mouse   |
| seq_Slc2a4_ROI_bisDNA   | GTAAGTGAAGTGGTGTGA     | mouse   |
| f_SLC2A4_ROI_bisDNA     | AGGGTAGGAAGGTAGTGTGA   | human   |
| r_SLC2A4_ROI_bisDNA_bio | CCACCCCTCACTCCTAACC    | human   |
| seq_SLC2A4_ROI_bisDNA   | GGAAGGTAGTGTGAG        | human   |

**Table S3.** Primer sequences used for generating insert with overhangs for luciferase assay.

| Name                        | Sequence                        | Species |
|-----------------------------|---------------------------------|---------|
| f_Slc2a4_ROI_gDNA_overhangs | CATAAGCTTGAGGAGGGATGG-TAGTGAGTG | mouse   |
| r_Slc2a4_ROI_gDNA_overhangs | AGTCCATGGGTGGGTG-GAGGGGCAGAG    | mouse   |
